# Supplementary material
Source: PubMed Central journal article supplement (PMC1730212)
Supplement: injprev_11_3_138__1.pdf [file injprev_11_3_138__1.pdf]

**Table 1** Follow up periods , percentage of person years (PY) with low and high and educational level, percentage of PY and deaths with missing data on educational level by setting and gender;  $\geq 30$  years old

| Country    | Follow up period | Men                             |                                  |                                             |                                                 | Women                            |                                  |                                             |                                                 |
|------------|------------------|---------------------------------|----------------------------------|---------------------------------------------|-------------------------------------------------|----------------------------------|----------------------------------|---------------------------------------------|-------------------------------------------------|
|            |                  | % PY with low educational level | % PY with high educational level | % PY with missing data on educational level | % deaths with missing data on educational level | % PY with low education al level | % PY with high educational level | % PY with missing data on educational level | % deaths with missing data on educational level |
| Finland    | 1991–95          | 49.61                           | 50.39                            | –                                           | 0.00                                            | 54.47                            | 45.53                            | –                                           | 0.00                                            |
| Norway     | 1990–95          | 77.01                           | 20.34                            | 2.65                                        | 2.34                                            | 82.79                            | 15.04                            | 2.17                                        | 1.80                                            |
| Denmark*   | 1991–95          | 50.24                           | 38.02                            | 11.74                                       | 16.04                                           | 48.01                            | 40.78                            | 11.21                                       | 15.53                                           |
| Belgium    | 1991–95          | 56.96                           | 34.25                            | 8.79                                        | 9.38                                            | 63.36                            | 27.82                            | 8.82                                        | 8.29                                            |
| Switzerlan | 1991–95          | 17.63                           | 80.84                            | 1.53                                        | 2.00                                            | 39.33                            | 58.20                            | 2.47                                        | 3.53                                            |
| d†         |                  |                                 |                                  |                                             |                                                 |                                  |                                  |                                             |                                                 |
| Austria    | 1991–92          | 75.41                           | 24.59                            | –                                           | 0.00                                            | 74.76                            | 25.24                            | –                                           | 0.00                                            |
| Turin      | 1991–96          | 68.29                           | 31.71                            |                                             | 0.00                                            | 77.66                            | 22.34                            |                                             | 0.00                                            |

| Country   | Follow up period | Men                             |                                  |                                             |                                                 | Women                           |                                  |                                             |                                                 |
|-----------|------------------|---------------------------------|----------------------------------|---------------------------------------------|-------------------------------------------------|---------------------------------|----------------------------------|---------------------------------------------|-------------------------------------------------|
|           |                  | % PY with low educational level | % PY with high educational level | % PY with missing data on educational level | % deaths with missing data on educational level | % PY with low educational level | % PY with high educational level | % PY with missing data on educational level | % deaths with missing data on educational level |
| (Italy)   |                  |                                 |                                  |                                             |                                                 |                                 |                                  |                                             |                                                 |
| Barcelona | 1992–96          | 62.71                           | 35.79                            | 1.5                                         | 30.77                                           | 69.54                           | 28.83                            | 1.62                                        | 32.52                                           |
| (Spain)   |                  |                                 |                                  |                                             |                                                 |                                 |                                  |                                             |                                                 |
| Madrid    | 1996–97          | 58.94                           | 37.63                            | 3.43                                        | 11.50                                           | 69.54                           | 27.23                            | 3.22                                        | 11.21                                           |
| (Spain)   |                  |                                 |                                  |                                             |                                                 |                                 |                                  |                                             |                                                 |

\*Data for Denmark refers to up to 69 years of age.

†German speaking parts of Switzerland.
